# Supplementary material for: Construction of an Infectious DNA Clone of Grapevine Geminivirus A and Its Biological Activity in Nicotiana benthamiana and Grapevine Plants
Source: Preprints.org preprint supplement (doi:10.20944/preprints202405.1044.v1), 2024-05-15

Table 1 Primers used in this study

| Primer | Sequences (5' →3')             | Gene                                   | Size (bp) | References             |
|--------|--------------------------------|----------------------------------------|-----------|------------------------|
| F1     | GGTTGGGTAAGCCGTTGAGAGCTCT      | GLRaV-1 <i>HSP70</i>                   | 637       | [22]                   |
| R1     | TAAGTTCCTCAGCACCTTCTACGA       |                                        |           |                        |
| F2     | TTTGCGAAGAAAGAAATCGTTAAGATGAGG | GLRaV-2 <i>p24</i>                     | 711       | [29]                   |
| R2     | TACGTCAGGTAGATACACCCACGTTTCGA  |                                        |           |                        |
| F3     | GCCCGCATCGATATGGACCTATCGTTTATT | GLRaV-3 <i>p19.7</i>                   | 540       | [29]                   |
| R3     | GCCGTCGACTTATAGTGCTCCGCAACAAA  |                                        |           |                        |
| F4     | ACATTCTCCACCTTGTGCTTTT         | GLRaV-4 <i>HSP70</i>                   | 319       | [33]                   |
| R4     | CATACAAGCGAGTGCAATTACA         |                                        |           |                        |
| F5     | AACACTCTGCTTTTCTGCTGGCA        | GLRaV-5 <i>p70</i>                     | 272       | [33]                   |
| R5     | TCTCCAGAAGACGGACCAATGTAA       |                                        |           |                        |
| F6     | GTTCTCCACGTTGTGCTTCTCC         | GLRaV-6 <i>HSP70</i>                   | 480       | Designed in this study |
| R6     | GGTTCATTCACTGCTTGAACC          |                                        |           |                        |
| F7     | CGAAGGTTTGCTATACGTCAACCC       | GLRaV-7 <i>p61</i>                     | 518       | [32]                   |
| R7     | TGAACAAGTGACGCCGACGA           |                                        |           |                        |
| F8     | CGGCATAAGAAAAGATGGCAC          | GLRaV-9 <i>HSP70</i>                   | 393       | [33]                   |
| R8     | TCATTCACTGCTTGAAC              |                                        |           |                        |
| F9     | ATCAGGTCGTGAACCAAGCAGG         | GLRaV-13 <i>HSP70h</i>                 | 253       | [31]                   |
| R9     | TAAGACCAGGTTGACCGTTGG          |                                        |           |                        |
| F10    | AAAGAYACCCCSGTTAGGGGWTTTC      | GLRaV-De <i>CP</i>                     | 1306      | [25]                   |
| R10    | CCRTTATTWGTAGCTACWACATTRCCYA   |                                        |           |                        |
| F11    | AAAGAYACCCCSGTTAGGGGWTTTC      | GLRaV-Pr <i>CP</i>                     | 1267      | [25]                   |
| R11    | CCRTTATTWGTAGCTACWACATTRCCYA   |                                        |           |                        |
| F12    | CCWGACYTMTCYTRCCAAG            | GFLV <i>CP</i>                         | 450       | [23]                   |
| R12    | GGYTTRCACAARACDCGAG            |                                        |           |                        |
| F13    | ATTGCCCCGAACCTCGTGTAAGC        | GFkV <i>CP</i>                         | 366       | [22]                   |
| R13    | CGGAGTCCTTGATGGTGGGGTTGA       |                                        |           |                        |
| F14    | GACAAATGGCACACTACG             | GVA <i>CP</i>                          | 429       | [22]                   |
| R14    | AAGCCTGACCTAGTCATCTTGG         |                                        |           |                        |
| F15    | GTGTACGAGACAATAAGCAAGCA        | GVB partial ORF3,<br>ORF4, IR and ORF5 | 722       | [24]                   |
| R15    | GTAGCCCTTCGTTTAGCCGCACT        |                                        |           |                        |
| F16    | AGGCGAATCAAGTACTTCATG          | GPGV <i>CP</i>                         | 340       | [22]                   |
| R16    | GGTGCTTCTTGATATATATTAGTATGC    |                                        |           |                        |
| F17    | ATGTCGATMAGRCAGGAATTG          | GINV <i>CP</i>                         | 585       | [21]                   |
| R17    | CATAGTAAAAGCACCTCGCT           |                                        |           |                        |
| F18    | CGTCACTGCTCTGATGTTGGTAG        | GRSPaV <i>CP</i>                       | 327       | [22]                   |
| R18    | AGGCGATATTAGCAACCATCTCAG       |                                        |           |                        |
| F19    | GGAAATAACATTCCCAGGAAG          | GFabV <i>polyprotein</i>               | 313       | Designed in this study |
| R19    | TCCTGCTGTCAAATTTTCATTC         |                                        |           |                        |
| F20    | ATGGACTTCAATCCGAGAAAGAGG       | GGVA <i>VI</i>                         | 685       | Designed in this study |
| R20    | GGCCTCCATACTTAATATCAGAGTAGG    |                                        |           |                        |

|     |                                                               |                          |      |                        |
|-----|---------------------------------------------------------------|--------------------------|------|------------------------|
| F21 | AGCGGAAGCATGATTGAGACATTGACG                                   | GRBV CP                  | 231  | [30]                   |
| R21 | AACGTATGTCCACTTGCAGAAGCCGC                                    |                          |      |                        |
| F22 | CACCCCTTCTCCCATGTGAC                                          | GRGV                     | 441  | [26]                   |
| R22 | ACAGCTGGGGCTTCAGGGTT                                          |                          |      |                        |
| F23 | CAAGCCATCCGTGCATCTGG                                          | GSyV-1                   | 297  | [27]                   |
| R23 | GCCGATTTGGAACCCGATGG                                          | <i>methyltransferase</i> |      |                        |
| F24 | GTGGGTGAACCACTCAAGGT                                          | GVE CP                   | 478  | [28]                   |
| R24 | AGACCACTTGCGGCTCTTTA                                          |                          |      |                        |
| F25 | GTTTAAACTGAAGGCGGGAAACGACAAT<br>CTAGACTCTTTGGATATATGGCACTGAGG | GGVA Fragment 1          | 1886 | Designed in this study |
| R25 | GAAGGATCAATTGCCAGTGCAATTG                                     |                          |      |                        |
| F26 | GATACAATTGCACTGGCAATTGATCC<br>TAACACATTGCGGACGTTTTTAATGTAC    | GGVA Fragment 2          | 1934 | Designed in this study |
| R26 | TGCGTCATCATGGTATCCCTTGTCAGG                                   |                          |      |                        |
| F27 | CAGTACATTAAAAACGTCCGCAATGTG                                   | linearized pXT1          | 3466 | Designed in this study |
| R27 | AGATTGTCGTTTCCCGCCTTCAG                                       |                          |      |                        |

Supplementary Figure 1

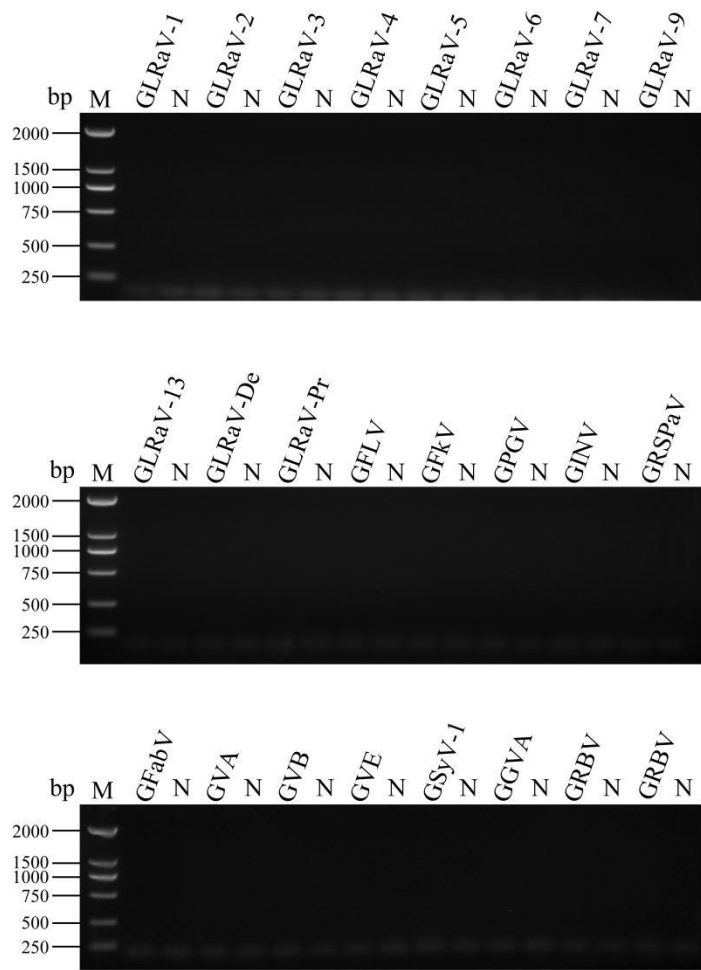

Figure 1

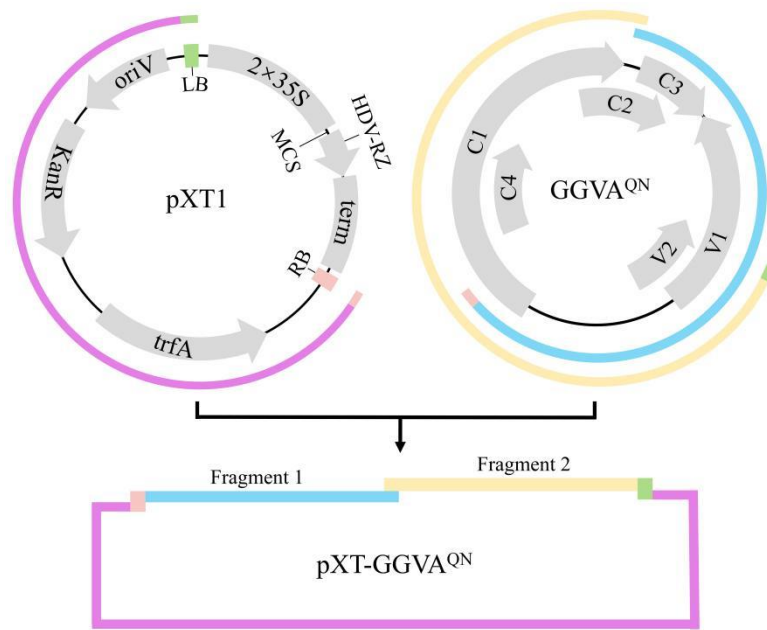

Figure 2

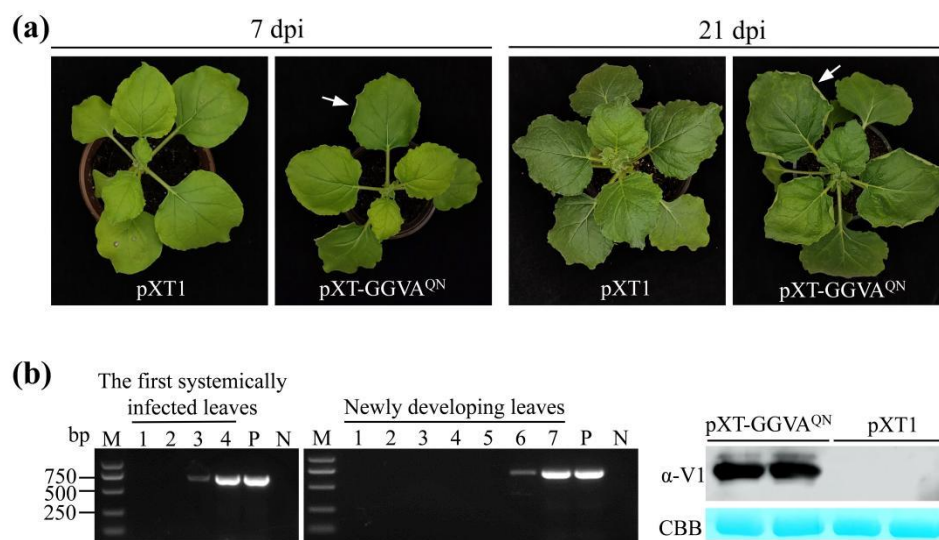

Figure 3

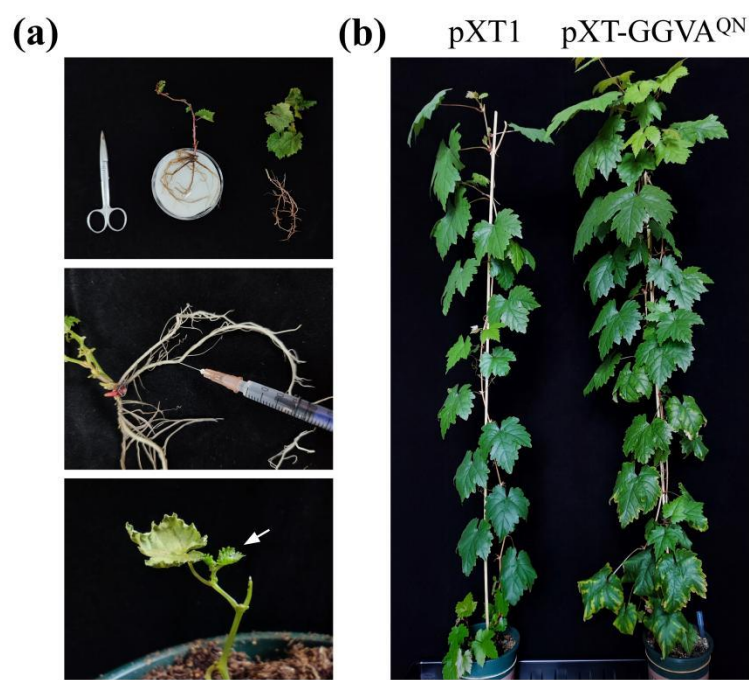

Figure 4

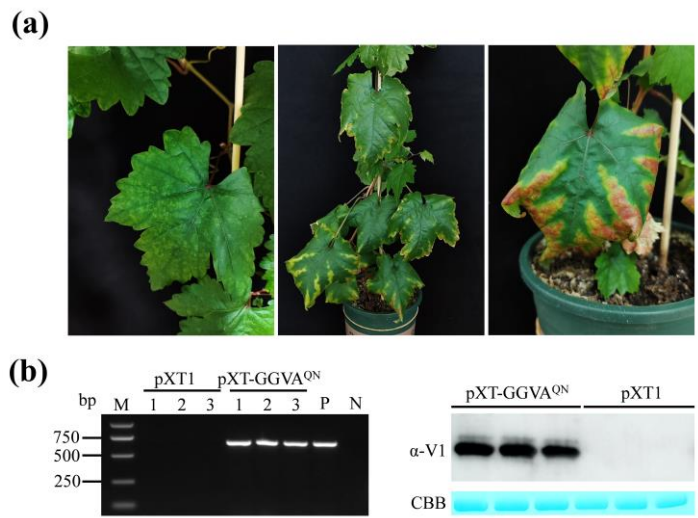

Supplement: Supplementary file 1 [file supplementary]
